# Supplementary material for: Hypocaloric diet with lower meal frequency did not affect weight loss, body composition and insulin responsiveness, but improved lipid profile: a randomized clinical trial
Source: Royal Society of Chemistry journal article supplement (doi:10.1039/d1fo00484k), 2021-01-01
Supplement: d1fo00484k1.pdf [file d1fo00484k1.pdf]

**Supplemental Table S1:** The caloric value and macronutrient distribution across each eating occasion of daily menu for each treatment

| <b>Diet Plan</b>          |                                                                                                                                                                                                                                                                                                                   |                          |                     |                 |                            |
|---------------------------|-------------------------------------------------------------------------------------------------------------------------------------------------------------------------------------------------------------------------------------------------------------------------------------------------------------------|--------------------------|---------------------|-----------------|----------------------------|
| Six daily eating occasion |                                                                                                                                                                                                                                                                                                                   |                          |                     |                 |                            |
| <b>Meal/snack</b>         | <b>Food groups</b>                                                                                                                                                                                                                                                                                                | <b>Carbohydrates (%)</b> | <b>Proteins (%)</b> | <b>Fats (%)</b> | <b>Total energy (kcal)</b> |
| Breakfast                 | - Grain foods (one serving)<br>- Dairy group (one and a half servings)<br>- Fruit (two servings)<br>- Butter (one dessertspoon)                                                                                                                                                                                   | 78.63                    | 5.81                | 15.56           | 301.09(15%)                |
| Snack                     | - Fruit (one serving)                                                                                                                                                                                                                                                                                             | 91.62                    | 6.70                | 1.68            | 42.96(2.14%)               |
| Lunch                     | - Dark-green vegetables (free)<br>- Red, orange or other vegetables (two servings)<br>- Beans, peas, and lentils vegetables (one serving)<br>- Grain foods (one and a half servings)<br>- Meat, poultry, and eggs (one serving)<br>- Fruit (one and a half servings)<br>- Extra-virgin olive oil (one tablespoon) | 58.67                    | 25.02               | 16.31           | 707.06(35.23%)             |
| Snack                     | - Grain foods (one serving)<br>- Dairy group (one servings)                                                                                                                                                                                                                                                       | 39.58                    | 27.66               | 75.36           | 186.01(9,27%)              |
| Dinner                    | - Dark-green vegetables (freely)<br>- Red, orange or other vegetables (two servings)<br>- Grain foods (one and a half servings)<br>- Meat, poultry, and eggs (one serving)<br>- Fruit (one serving)<br>- Extra-virgin olive oil (one tablespoon)                                                                  | 36.53                    | 41.41               | 22.06           | 614.50(30.62%)             |
| Evening snack             | - Fruit (two servings)                                                                                                                                                                                                                                                                                            | 24.30                    | 2.70                | -               | 108 (5.38%)                |
| <b>Total</b>              |                                                                                                                                                                                                                                                                                                                   | 54.14                    | 25.62               | 21.86           | 2006.47 (100%)             |

| <b>Diet Plan</b>            |                                                                                                                                                                                                                                                                                                            |                          |                     |                 |                            |
|-----------------------------|------------------------------------------------------------------------------------------------------------------------------------------------------------------------------------------------------------------------------------------------------------------------------------------------------------|--------------------------|---------------------|-----------------|----------------------------|
| Three daily eating occasion |                                                                                                                                                                                                                                                                                                            |                          |                     |                 |                            |
| <b>Meal/snack</b>           | <b>Food groups</b>                                                                                                                                                                                                                                                                                         | <b>Carbohydrates (%)</b> | <b>Proteins (%)</b> | <b>Fats (%)</b> | <b>Total energy (kcal)</b> |
| Breakfast                   | - Grain foods (one and a half servings)<br>- Dairy group (one and a half servings)<br>- Fruit (three servings)<br>- Butter (one dessertspoon)                                                                                                                                                              | 69.88                    | 15.71               | 31.51           | 463.49(23.10%)             |
| Lunch                       | - Dark-green vegetables (freely)<br>- Red, orange or other vegetables (three servings)<br>- Beans, peas, and lentils vegetables (one serving)<br>- Grain foods (one and a half servings)<br>- Meat, poultry, and eggs (one serving)<br>- Fruit (two servings)<br>- Extra-virgin olive oil (one tablespoon) | 55.09                    | 24.97               | 19.93           | 736.17(36.70%)             |
| Dinner                      | - Dark-green vegetables (freely)<br>- Red, orange or other vegetables (three servings)<br>- Grain foods (one and a half servings)<br>- Meat, poultry, and eggs (one serving)<br>- Fruit (two serving)<br>- Extra-virgin olive oil (one tablespoon)                                                         | 37.89                    | 34.76               | 27.35           | 757.50(37,76%)             |
| <b>Total</b>                |                                                                                                                                                                                                                                                                                                            | 50.68                    | 25.92               | 24.93           | 2005.63 (100%)             |
